# Supplementary material
Source: PubMed Central journal article supplement (PMC3753937)
Supplement: AEM.00202-13_zam999104509so1.pdf [file AEM.00202-13_zam999104509so1.pdf]

## SUPPLEMENTARY MATERIALS

Supplementary Table S1. Statistics of reads mapped to the assembled *Leptospirillum* Group IV UBA BS genome. Inferred read error (IRE) = % total number of mapped errors such as INDELS and SNPs divided by the number of mapped bases (gsMapper - Roche/454).

| <b>Sample</b> | <b>Seq.</b> | <b>% Reads mapped</b> | <b>Inferred read error</b> | <b>% total dataset</b> | <b>Reference</b>     |
|---------------|-------------|-----------------------|----------------------------|------------------------|----------------------|
| UBABS         | Sanger      | 36.06                 | 0.57                       | 2.57                   | This study           |
| UBA           | Sanger      | 14.56                 | 1.75                       | 1.07                   | (Lo et al., 2007)    |
| 5way CG       | Sanger      | 22.70                 | 4.96                       | 1.32                   | (Tyson et al., 2004) |

Supplementary Figure S1. Images of UBA BS-like biofilms. Scale bars = 1 cm. A) Photograph of biofilms growing in the A-drift of the Richmond Mine; B) Photograph of a UBABS biofilm on a petri dish.

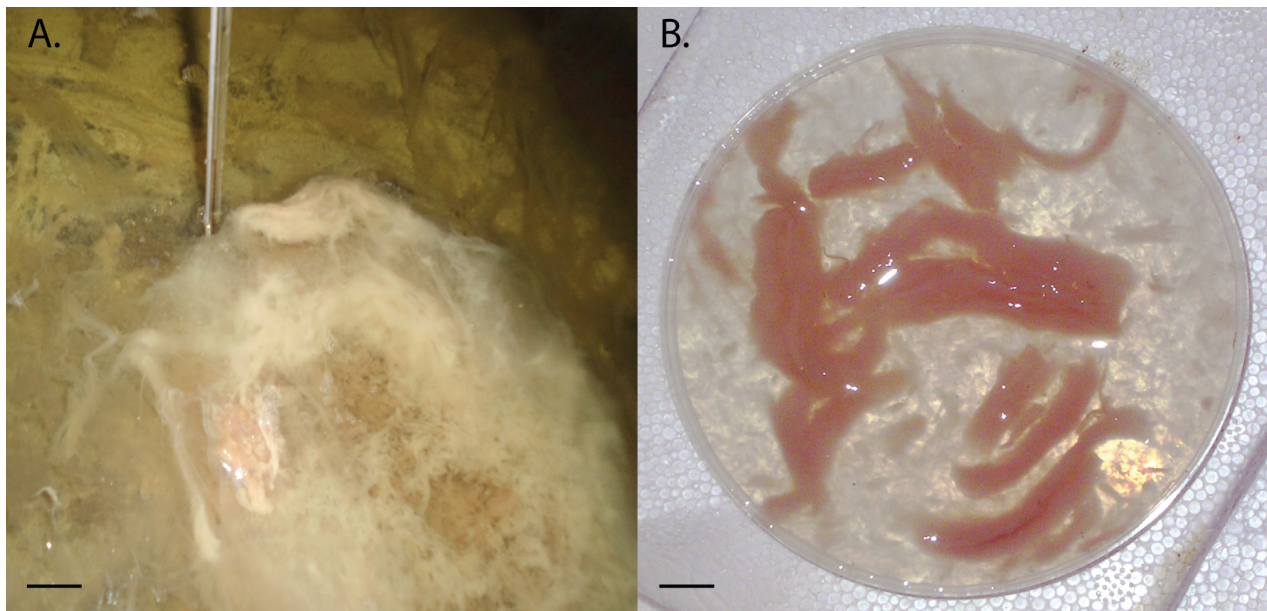

Supplementary Figure S2. Sample UBA BS Dec10 (collected on 12/28/10, at pH 0.98 and temperature 38 °C). A) general bacteria (green) and *L. ferrodiazotrophum* (yellow). B) DAPI-stain (blue) and *Leptospirillum* group II 5wayCG (red/pink). Scale bar = 1 μm.

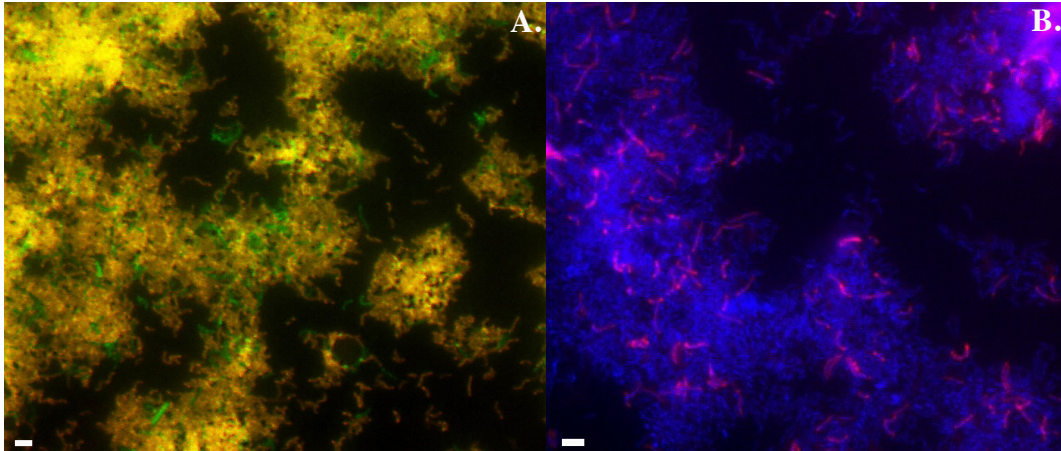

Supplementary Figure S3. Estimation of genome completeness in *Leptospirillum* group IV UBA BS based on 30 single copy genes. Some genes in *Leptospirillum* group IV UBA BS are split due to gaps within genes.

|                             | CTP synthetase | DNA gyrase A | DNA gyrase B | EF-Ts | frf gene | histidyl tRNA synthetase | initiation factor IF3 | Leucyl tRNA synthetase | NusA | phenylalanyl tRNA synthetase | Phosphoglycerate kinase | RecA | Ribosomal L1 | Ribosomal L2 | Ribosomal L3 | Ribosomal L4 | Ribosomal L5 | Ribosomal L6 | Ribosomal L10 | Ribosomal L11 | Ribosomal L13 | Ribosomal L14 | Ribosomal L15 | Ribosomal L16 | Ribosomal L18 | Ribosomal L19 | Ribosomal L20 | Ribosomal L22 | Ribosomal L27 | Ribosomal S2 | Ribosomal S3 | Ribosomal S5 | Ribosomal S9 | Ribosomal S10 | Ribosomal S11 | Ribosomal S13 | RpoB | vayJ tRNA synth. |   |   |   |
|-----------------------------|----------------|--------------|--------------|-------|----------|--------------------------|-----------------------|------------------------|------|------------------------------|-------------------------|------|--------------|--------------|--------------|--------------|--------------|--------------|---------------|---------------|---------------|---------------|---------------|---------------|---------------|---------------|---------------|---------------|---------------|--------------|--------------|--------------|--------------|---------------|---------------|---------------|------|------------------|---|---|---|
| <i>L. rubarum</i>           | 1              | 1            | 1            | 1     | 1        | 1                        | 1                     | 1                      | 1    | 1                            | 1                       | 1    | 1            | 1            | 1            | 1            | 1            | 1            | 1             | 1             | 1             | 1             | 1             | 1             | 1             | 1             | 1             | 1             | 1             | 1            | 1            | 1            | 1            | 1             | 1             | 1             | 1    | 1                | 1 | 1 |   |
| <i>L. group II 5wayCG</i>   | 1              | 1            | 1            | 1     | 1        | 1                        | 1                     | 1                      | 1    | 1                            | 1                       | 1    | 1            | 1            | 1            | 1            | 1            | 1            | 1             | 1             | 1             | 1             | 1             | 1             | 1             | 1             | 1             | 1             | 1             | 1            | 1            | 1            | 1            | 1             | 1             | 1             | 1    | 1                | 1 | 1 | 1 |
| <i>L. ferrodiazotrophum</i> | 1              | 1            | 1            | 1     | 1        | 1                        | 1                     | 1                      | 1    | 1                            | 1                       | 1    | 1            | 1            | 1            | 1            | 1            | 1            | 1             | 1             | 1             | 1             | 1             | 1             | 1             | 1             | 1             | 1             | 1             | 1            | 1            | 1            | 1            | 1             | 1             | 1             | 1    | 1                | 1 | 1 | 1 |
| <i>L. group IV</i>          | .              | .            | .            | .     | 1        | 1                        | 1                     | 2                      | 1    | 1                            | 2                       | 1    | 1            | 1            | 1            | 1            | 1            | 1            | 1             | 1             | 1             | 1             | 1             | 1             | 1             | 1             | 1             | 1             | 1             | 1            | 1            | 1            | 1            | 1             | 1             | 1             | 1    | 1                | 2 | 2 | 1 |

Supplementary Figure S4. Phylogenetic analysis of: A) 23S rRNA gene tree, B) Protein tree for RpoB, C) ribosomal protein S3, and D) ribosomal protein L5. Sequences were aligned and trees were constructed in the MABL website (Dereeper et al., 2008).

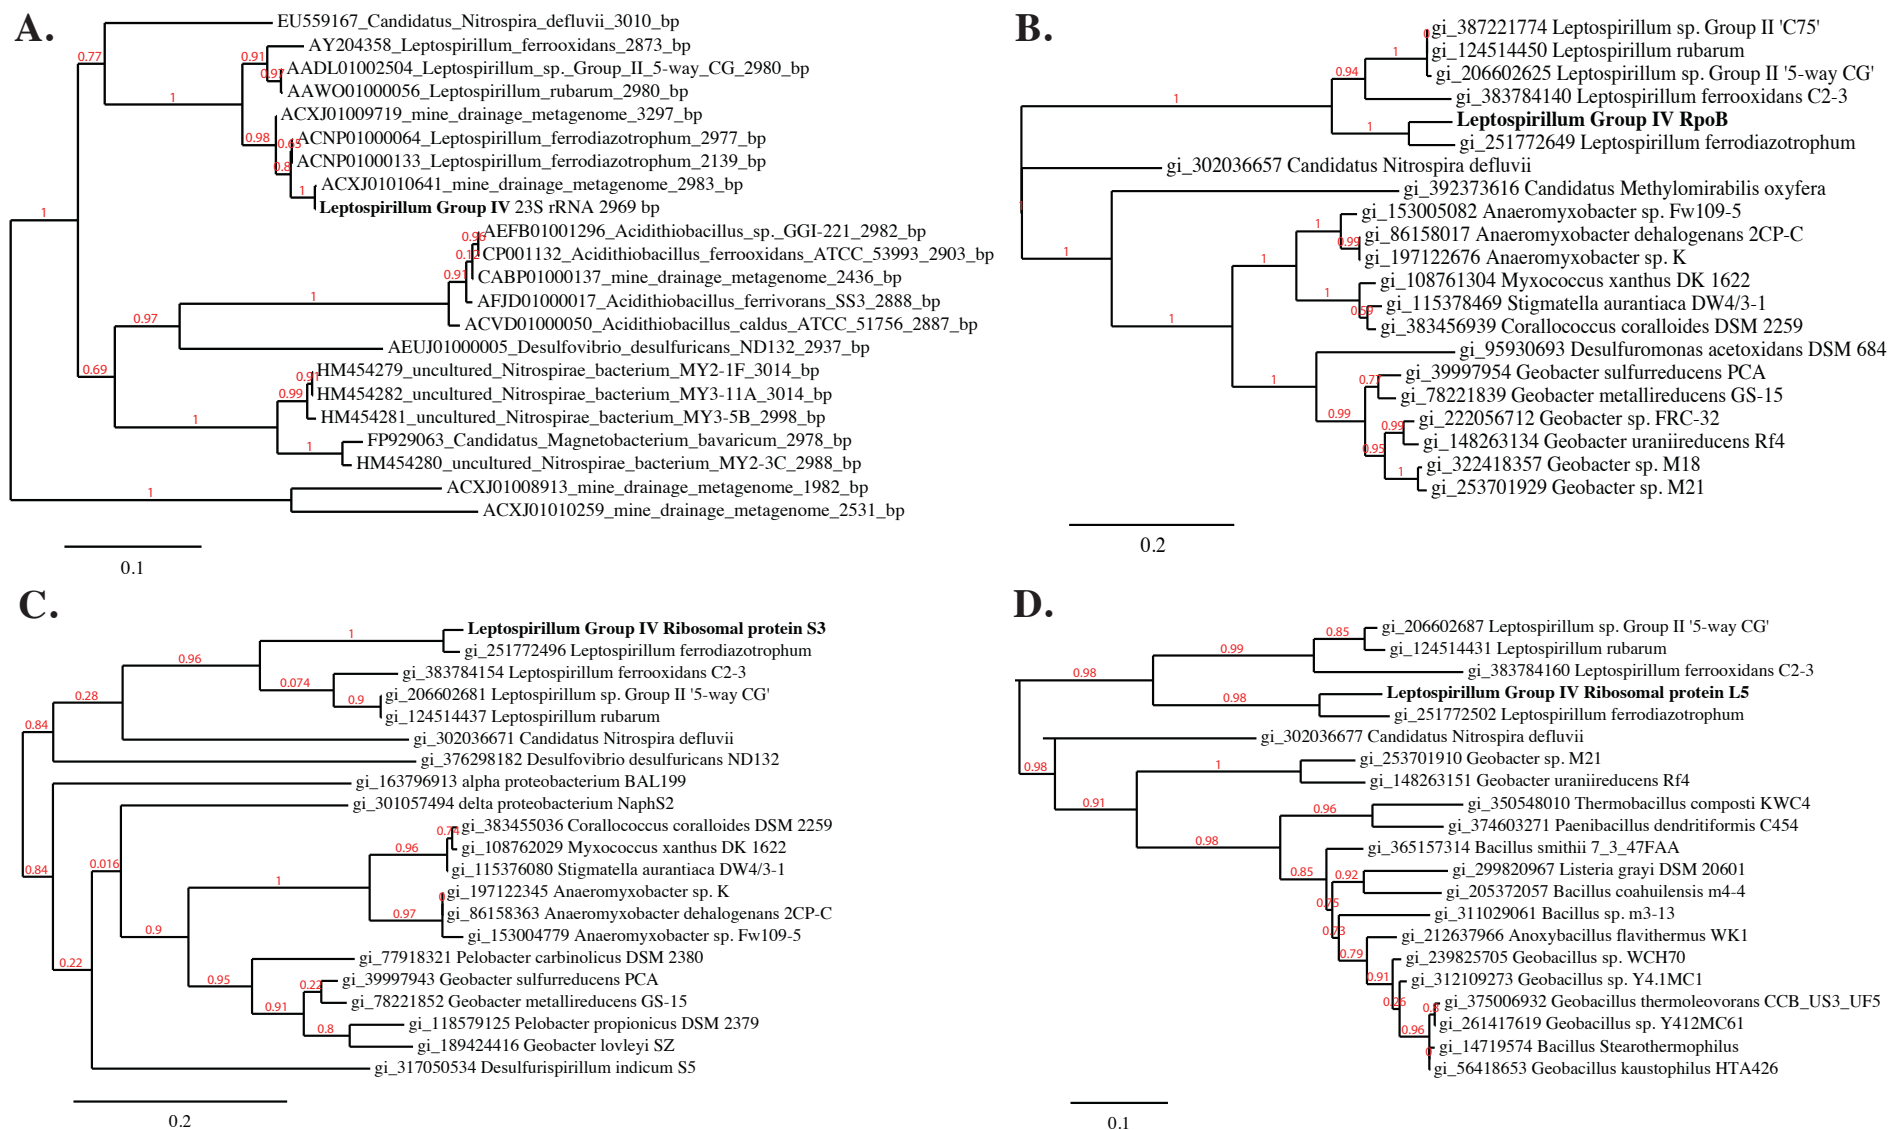

Supplementary Figure S5. Clustering of transcriptomic reads mapping to *Leptospirillum* Group IV UBA BS genes. Cluster 1: (2) IstB domain-containing proteins, (3) hypothetical proteins, (1) ATP synthase, (1) PFOR, (1) type-III restriction enzyme, (1) glycogen operon protein GlgX, (2) transporters, and (2) transposases. Red: overrepresented, green: underrepresented, grey: not identified by transcriptomics.

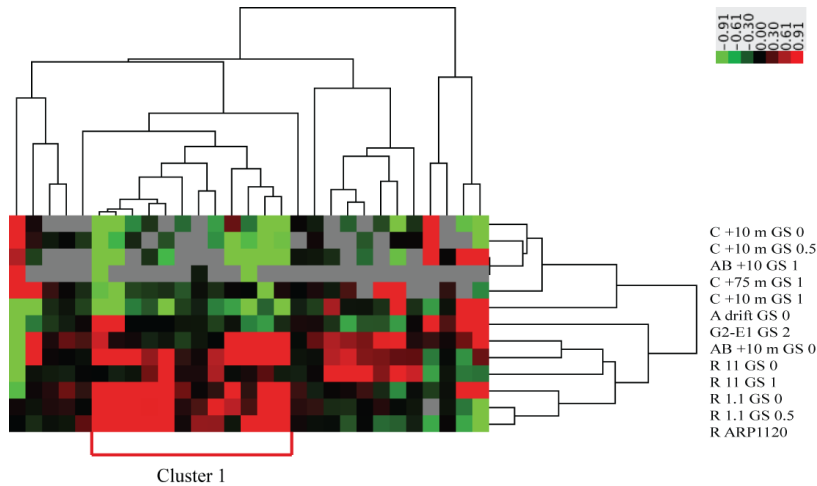

## REFERENCES

- Dereeper, A., Guignon, V., Blanc, G., Audic, S., Buffet, S., Chevenet, F. et al. (2008)  
Phylogeny.fr: robust phylogenetic analysis for the non-specialist. *Nucleic Acids Res* **36**: W465-469.
- Lo, I., Deneff, V.J., Verberkmoes, N.C., Shah, M.B., Goltsman, D., DiBartolo, G. et al. (2007)  
Strain-resolved community proteomics reveals recombining genomes of acidophilic bacteria. *Nature* **446**: 537-541.
- Tyson, G.W., Chapman, J., Hugenholtz, P., Allen, E.E., Ram, R.J., Richardson, P.M. et al. (2004)  
Community structure and metabolism through reconstruction of microbial genomes from the environment. *Nature* **428**: 37-43.

## Fluorescence *in situ* hybridization protocol

### Fixation:

1. Wash samples with PBS pH 1, then with PBS pH 7. Centrifuge and discard supernatant.
2. Add about 500ul of fixative (PFA 4%)
3. Incubate for about 2 hours at 4 degrees C.
4. Centrifuge and discard supernatant
5. Add 1 volume of PBS pH 7.0 + 1 volume of ethanol 100%

### Hybridization:

1. Put 5ul of fixed sample on a well on the slide.
2. Let air dry
3. Prepare hybridization buffer in a 2ml eppendorf tube:
  - 798ul of miliQ water
  - 800ul of formamide
  - 360ul of NaCl 5M
  - 40ul of buffer Tris-HCl pH 8.0
  - 2ul of SDS 10%
4. Dehydrate slide in 50%, 80% and 90% ethanol, for 3 minutes each
5. Let air dry
6. Prepare hybridization chamber by placing a kimwipe in a 50ml falcon tube, and add about 1.8ml of hybridization buffer.
7. Add 8ul of hybridization buffer to each well
8. Add 1ul of each probe to each well
9. Place slide in hybridization chamber and incubate at 46 degrees C for about 2 hours
10. Prepare washing buffer in a 50ml falcon tube, warm to 48 degrees in water bath:
  - 48 ml miliQ water
  - 460 ul of NaCl 5M
  - 1 ml of buffer Tris-HCl pH 8.0
  - 50 ul of SDS 10%
11. Rinse the slide with a little bit of warm (48 degrees) washing buffer and place slide in the washing buffer tube. Let wash for 15 minutes at 48 degrees in the water bath
12. Rinse slide with miliQ water
13. Let air dry
14. Mount media for visualization (Vectashield) and analyze results.
